# Supplementary material for: EslB Is Required for Cell Wall Biosynthesis and Modification in Listeria monocytogenes
Source: PubMed Central journal article supplement (PMC7847544; doi:10.1128/jb.00553-20), 2021-01-25
Supplement: JB.00553-20-s0001.pdf [file JB.00553-20-s0001.pdf]

**SUPPLEMENTAL MATERIAL FOR MANUSCRIPT:**

**EsIB is required for cell wall biosynthesis and modification in *Listeria monocytogenes***

**Jeanine Rismondo<sup>a,b,#</sup>, Lisa M. Schulz<sup>b</sup>, Maria Yacoub<sup>a</sup>, Ashima Wadhawan<sup>c</sup>, Michael Hoppert<sup>b</sup>, Marc S. Dionne<sup>c</sup>, Angelika Gründling<sup>a,#</sup>**

<sup>a</sup> Section of Molecular Microbiology and Medical Research Council Centre for Molecular Bacteriology and Infection, Imperial College London, London SW7 2AZ.

<sup>b</sup> Department of General Microbiology, GZMB, Georg-August-University Göttingen, 37077 Göttingen, Germany

<sup>c</sup> Department of Life Sciences, Medical Research Council Centre for Molecular Bacteriology and Infection, Imperial College London, London SW7 2AZ.

<sup>#</sup>To whom correspondence should be addressed:

Jeanine Rismondo – [jrismon@gwdg.de](mailto:jrismon@gwdg.de), Angelika Gründling – [a.grundling@imperial.ac.uk](mailto:a.grundling@imperial.ac.uk)

## SUPPLEMENTAL TABLES

**Table S1: Bacterial strains used in this study**

| Unique ID                                    | Strain name and resistance                                                                                                                                           | Source     |
|----------------------------------------------|----------------------------------------------------------------------------------------------------------------------------------------------------------------------|------------|
| <b><i>Escherichia coli</i> strains</b>       |                                                                                                                                                                      |            |
| ANG1264                                      | DH5 $\alpha$ pKSV7; AmpR                                                                                                                                             | (1)        |
| 1265                                         | XL1-Blue pKT25; KanR                                                                                                                                                 | (2)        |
| 1266                                         | XL1-Blue pKNT25; KanR                                                                                                                                                | (3)        |
| 1267                                         | XL1-Blue pUT18; AmpR                                                                                                                                                 | (2)        |
| 1268                                         | XL1-Blue pUT18C; AmpR                                                                                                                                                | (2)        |
| 1269                                         | XL1-Blue pKT25- <i>zip</i> ; KanR                                                                                                                                    | (4)        |
| 1270                                         | XL1-Blue pUT18C- <i>zip</i> ; AmpR                                                                                                                                   | (4)        |
| ANG4243                                      | XL1-Blue pIMK3; KanR                                                                                                                                                 | (5)        |
| ANG4236                                      | XL1-Blue pKSV7- $\Delta$ <i>eslB</i> ; AmpR                                                                                                                          | This study |
| ANG4647                                      | XL1-Blue pIMK3- <i>eslB</i> ; KanR                                                                                                                                   | This study |
| ANG5660                                      | XL1-Blue pPL3e-P <sub><i>eslA</i></sub> - <i>eslABC</i> ; CamR                                                                                                       | This study |
| ANG5661                                      | SM10 pPL3e-P <sub><i>eslA</i></sub> - <i>eslABC</i> ; KanR CamR                                                                                                      | This study |
| EJR4                                         | XL1-Blue pKNT25- <i>eslA</i> ; KanR                                                                                                                                  | This study |
| EJR5                                         | XL1-Blue pKT25- <i>eslA</i> ; KanR                                                                                                                                   | This study |
| EJR6                                         | XL1-Blue pUT18- <i>eslA</i> ; AmpR                                                                                                                                   | This study |
| EJR7                                         | XL1-Blue pUT18C- <i>eslA</i> ; AmpR                                                                                                                                  | This study |
| EJR8                                         | XL1-Blue pKNT25- <i>eslB</i> ; KanR                                                                                                                                  | This study |
| EJR9                                         | XL1-Blue pKT25- <i>eslB</i> ; KanR                                                                                                                                   | This study |
| EJR10                                        | XL1-Blue pUT18- <i>eslB</i> ; AmpR                                                                                                                                   | This study |
| EJR11                                        | XL1-Blue pUT18C- <i>eslB</i> ; AmpR                                                                                                                                  | This study |
| EJR12                                        | XL1-Blue pKNT25- <i>eslC</i> ; KanR                                                                                                                                  | This study |
| EJR13                                        | XL1-Blue pKT25- <i>eslC</i> ; KanR                                                                                                                                   | This study |
| EJR14                                        | CLG190 pUT18- <i>eslC</i> ; AmpR                                                                                                                                     | This study |
| EJR15                                        | XL1-Blue pUT18C- <i>eslC</i> ; AmpR                                                                                                                                  | This study |
| EJR39                                        | XL1-Blue pIMK2- <i>mNeonGreen-zapA</i> ; KanR                                                                                                                        | This study |
| EJR43                                        | XL1-Blue pKSV7- $\Delta$ <i>eslC</i> ; AmpR                                                                                                                          | This study |
| EJR54                                        | XL1-Blue pKSV7- $\Delta$ <i>eslA</i> ; AmpR                                                                                                                          | This study |
| EJR60                                        | S17-1 pIMK2- <i>mNeonGreen-zapA</i> ; KanR                                                                                                                           | This study |
| <b><i>Listeria monocytogenes</i> strains</b> |                                                                                                                                                                      |            |
| ANG1263                                      | 10403S; StrepR                                                                                                                                                       | (6)        |
| ANG4275                                      | 10403S $\Delta$ <i>eslB</i> <sub>(1)</sub> ; StrepR                                                                                                                  | This study |
| ANG4678                                      | 10403S pIMK3- <i>eslB</i> ; StrepR KanR                                                                                                                              | This study |
| ANG4688                                      | 10403S $\Delta$ <i>eslB</i> <sub>(1)</sub> pIMK3- <i>eslB</i> (or short: 10403S $\Delta$ <i>eslB</i> <sub>(1)</sub> compl.); StrepR KanR                             | This study |
| ANG5662                                      | 10403S $\Delta$ <i>eslB</i> <sub>(2)</sub> ; StrepR                                                                                                                  | This study |
| ANG5663                                      | 10403S $\Delta$ <i>eslB</i> <sub>(2)</sub> pPL3e-P <sub><i>eslA</i></sub> - <i>eslABC</i> (or short: 10403S $\Delta$ <i>eslB</i> <sub>(2)</sub> compl.); ErmR StrepR | This study |
| LJR7                                         | 10403S $\Delta$ <i>eslC</i> ; StrepR                                                                                                                                 | This study |
| LJR21                                        | 10403S $\Delta$ <i>eslC</i> pPL3e-P <sub><i>eslA</i></sub> - <i>eslABC</i> (or short: 10403S $\Delta$ <i>eslC</i> compl.); ErmR StrepR                               | This study |
| LJR28                                        | 10403S pIMK2- <i>mNeonGreen-zapA</i> ; StrepR KanR                                                                                                                   | This study |
| LJR29                                        | 10403S $\Delta$ <i>eslB</i> <sub>(2)</sub> pIMK2- <i>mNeonGreen-zapA</i> ; StrepR KanR                                                                               | This study |
| LJR33                                        | 10403S $\Delta$ <i>eslA</i> ; StrepR                                                                                                                                 | This study |
| LJR34                                        | 10403S $\Delta$ <i>eslA</i> pPL3e-P <sub><i>eslA</i></sub> - <i>eslABC</i> (or short: 10403S $\Delta$ <i>eslC</i> compl.); ErmR StrepR                               | This study |

**Table S2: Primers used in this study**

| Number  | Name                              | Sequence                                       |
|---------|-----------------------------------|------------------------------------------------|
| ANG2532 | <i>eslB</i> up fw                 | GCGCGGATCCCCGCAATATGTGAAATTAGTATAAT<br>G       |
| ANG2533 | <i>eslB</i> up rev                | TTGGAAAAGCCCTTCCCGGTACCATAACCCTCGAT<br>TAAACAT |
| ANG2534 | <i>eslB</i> down fw               | TGGTACCGGGAAGGGCTTTTCCAATTGTCTAAAAC<br>GAATTAA |
| ANG2535 | <i>eslB</i> down rev              | GCGCTCTAGAGCTCGCGCACTCTCATAAAC                 |
| ANG2812 | pIMK3- <i>eslB</i> fw             | GCGCCCATGGGGTTTAATCGAGGGTTATGGTACC             |
| ANG2813 | pIMK3- <i>eslB</i> rev            | GCGCGTTCGACTTAATTCGTTTTAGACAATTGGAAA           |
| ANG3349 | pPL3e- <i>eslABC</i> fw Sall      | ACGCGTTCGACCTGGATGTGGCGTAAGGG                  |
| ANG3350 | pPL3e- <i>eslABC</i> rev<br>BamHI | CGCGGATCCCATAACTTTGTCCCGATTGTCC                |
| JR39    | Neon_rev                          | GCCACTACTTGTCTTATAGAGTTCATCCATACCCA            |
| JR40    | Neon_ZapA_dw_f                    | GAACTCTATAAGACAAGTAGTGGCCTAAACGAATT<br>T       |
| JR44    | B2H <i>EslA</i> fw XbaI           | CTAGTCTAGAAAAAATTCGGAACTTAACTAAAAAG<br>ATG     |
| JR45    | B2H <i>EslA</i> rev KpnI          | CGGGGTACCGGAATCTCGTAATAATCTATTTTATC<br>ATTTG   |
| JR46    | B2H <i>EslB</i> fw XbaI           | CTAGTCTAGAATTTAATCGAGGGTTATGGTACC              |
| JR47    | B2H <i>EslB</i> rev BamHI         | CGCGGATCCCAATTCGTTTTAGACAATTGGAAAAG<br>C       |
| JR48    | B2H <i>EslC</i> fw XbaI           | CTAGTCTAGAAACGACAGAAACAGAAACGATTAA<br>AC       |
| JR49    | B2H <i>EslC</i> rev KpnI          | CGGGGTACCGGTAAGGATGGAATATTTTTCTTTTC<br>TTC     |
| JR73    | p3-mNeon-Zap fw NcoI              | CATGCCATGGTTTTCGAAAGGAGAGGAGGATAAT             |
| JR74    | p3-mNeon-Zap rev Sall             | GCGCGTTCGACTTAATCTCTTCCTTTAATTCGAGC            |
| LMS155  | <i>eslC</i> up fwd                | CGCGGATCCAATTTTTCTTCGCCATCGCTTCC               |
| LMS156  | <i>eslC</i> down rev              | CGGGGTACCCTGCATCATTACCATATAAACGGACG            |
| LMS157  | <i>eslC</i> down fwd              | CTACATTAATATGCTTCGTTAAATTAGCTTTCAATT<br>CAGC   |
| LMS158  | <i>eslC</i> up rev                | ATTTAACGAAGCATATTAATGTAGCGTTAAGTCCG<br>ATTGTAA |
| LMS159  | <i>eslA</i> down rev              | CCGGAATTCGCTTCTTTGTTTTATACCCAGCATT<br>C        |
| LMS160  | <i>eslA</i> up fwd                | CGCGGATCCGAGTACACTTAATATTACGCTAAAA<br>TCACAG   |
| LMS161  | <i>eslA</i> up rev                | AAAAGATGGACGCGATAGAAGACATTTTCACGGTG<br>C       |
| LMS162  | <i>eslA</i> down fwd              | TGTCTTCTATCGCGTCCATCTTTTTAGTTAAGTTCC<br>GAA    |
|         | EGD-E_ActA_L1                     | AAGCGAAGGAAGAACCAGGG                           |
|         | EGD-E_ActA_R1                     | CCCCTAAAGAGAACACGCCA                           |

**Table S3: Identified sequence alterations in *L. monocytogenes* *eslB* deletion and complementation strains.**

| Strain number                                | Reference position <sup>1</sup> | Type <sup>2</sup> | Ref <sup>3</sup> | Allele <sup>4</sup> | Frequency <sup>5</sup> | Average Quality <sup>6</sup> | Annotations                                         | AA change <sup>7</sup> |
|----------------------------------------------|---------------------------------|-------------------|------------------|---------------------|------------------------|------------------------------|-----------------------------------------------------|------------------------|
| ANG4275                                      | 2425786-                        | DEL               |                  |                     | 100%                   |                              | <i>lmo2396</i> ,                                    | 30 aa                  |
| 10403SΔ <i>eslB</i> <sub>(1)</sub>           | 2425875                         |                   |                  |                     |                        |                              | internalin                                          | deletion               |
| ANG4688                                      | 2366318                         | SNV               | C                | A                   | 100%                   | 37.04                        | <i>lmo2342</i> , 16S                                | Val186Leu              |
| 10403SΔ <i>eslB</i> <sub>(1)</sub><br>compl. |                                 |                   |                  |                     |                        |                              | pseudo<br>uridylylate<br>synthase                   |                        |
| ANG5662                                      | –                               |                   |                  |                     |                        |                              |                                                     |                        |
| 10403SΔ <i>eslB</i> <sub>(2)</sub>           |                                 |                   |                  |                     |                        |                              |                                                     |                        |
| ANG5663                                      | 2058478                         | DEL               | A                | –                   | 100%                   | 36.33                        | <i>lmo2022</i> , NifS-                              | His171fs               |
| 10403SΔ <i>eslB</i> <sub>(2)</sub><br>compl. |                                 |                   |                  |                     |                        |                              | like protein<br>required for<br>NAD<br>biosynthesis |                        |

<sup>1</sup> Reference position is based on the position in the *L. monocytogenes* 10403S reference genome (NC\_01744).

<sup>2</sup> Type of mutation: SNV = single nucleotide variant; DEL = nucleotide deletion.

<sup>3</sup> Ref indicates base in reference genome.

<sup>4</sup> Allele indicates base at the same position in the sequenced strain.

<sup>5</sup> Frequency at which the base change was found in the sequenced strain.

<sup>6</sup> Average quality score.

<sup>7</sup> AA change indicates the resulting amino acid change in the protein found in the reference strains as compared to the sequenced strain.

## SUPPLEMENTAL FIGURES

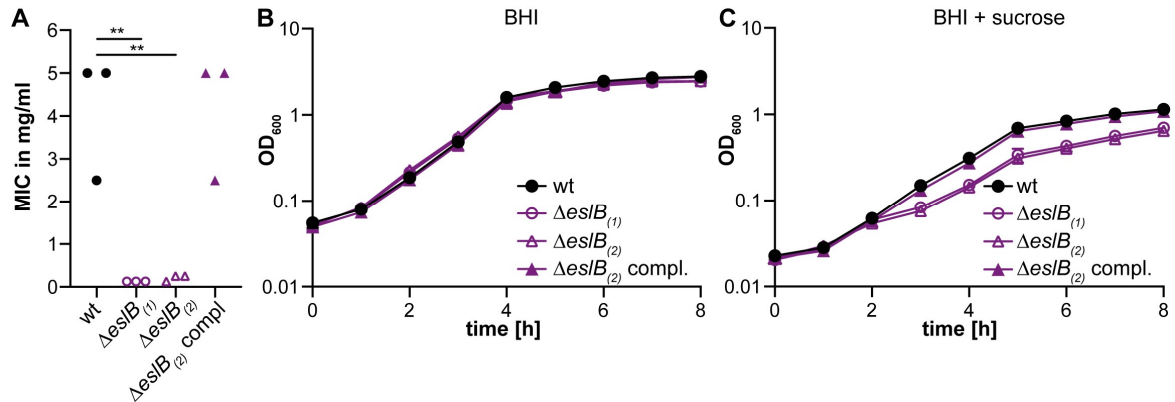

**Figure S1: Comparison of lysozyme sensitivity and growth of two different *eslB* mutants and a complementation strain.** (A) The minimal inhibitory concentration for lysozyme was determined for *L. monocytogenes* strains 10403S (wt), 10403S $\Delta eslB_{(1)}$ , 10403S $\Delta eslB_{(2)}$  and 10403S $\Delta eslB_{(2)}$  compl. using a microbroth dilution assay. The results of three independent experiments are shown. For statistical analysis, a one-way ANOVA followed by a Dunnett's multiple comparisons test was used (\*\*  $p \leq 0.01$ ). (B-C) Growth analysis of *L. monocytogenes* strains 10403S (wt), 10403S $\Delta eslB_{(1)}$ , 10403S $\Delta eslB_{(2)}$  and 10403S $\Delta eslB_{(2)}$  compl. in (B) BHI broth or (C) BHI broth containing 0.5 M sucrose. All cultures were incubated at 37°C and the bacterial growth monitored by determining OD<sub>600</sub> readings at hourly intervals. The average OD<sub>600</sub> readings and standard deviations were calculated from three independent experiments and plotted.

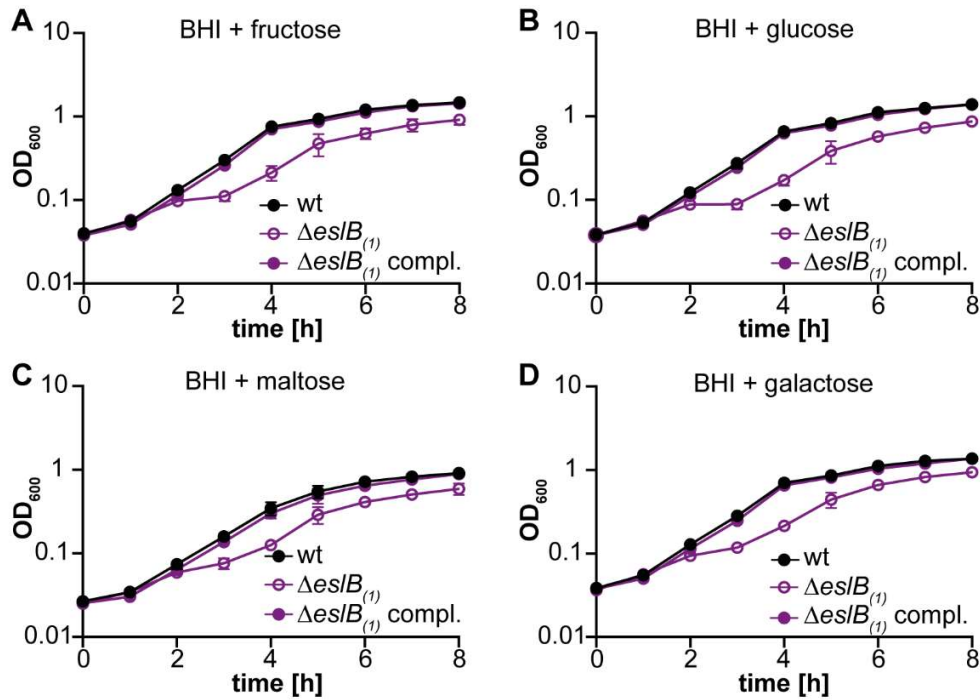

**Figure S2: The *L. monocytogenes* *eslB* mutant has a growth defect in BHI medium containing 0.5 M added sugar.** *L. monocytogenes* strains 10403S (wt), 10403S $\Delta eslB_{(1)}$  and the complementation strain 10403S $\Delta eslB_{(1)}$  compl. were grown in BHI broth containing (A) 0.5 M fructose, (B) 0.5 M glucose, (C) 0.5 M maltose or (D) 0.5 M galactose. Strain 10403S $\Delta eslB_{(1)}$  compl. was grown in the presence of 1 mM IPTG. All cultures were incubated at 37°C and bacterial growth was monitored by determining OD<sub>600</sub> readings at hourly intervals. Average OD<sub>600</sub> values and standard deviations were calculated from three independent experiments and plotted. Of note, some of the error bars are too small to be seen on the graph.

## REFERENCES

1. Smith K, Youngman P. 1992. Use of a new integrational vector to investigate compartment-specific expression of the *Bacillus subtilis spoIIM* gene. *Biochimie* 74:705-11.
2. Karimova G, Ullmann A, Ladant D. 2001. Protein-protein interaction between *Bacillus stearothermophilus* tyrosyl-tRNA synthetase subdomains revealed by a bacterial two-hybrid system. *J Mol Microbiol Biotechnol* 3:73-82.
3. Karimova G, Dautin N, Ladant D. 2005. Interaction network among *Escherichia coli* membrane proteins involved in cell division as revealed by bacterial two-hybrid analysis. *J Bacteriol* 187:2233-43.
4. Karimova G, Pidoux J, Ullmann A, Ladant D. 1998. A bacterial two-hybrid system based on a reconstituted signal transduction pathway. *Proc Natl Acad Sci U S A* 95:5752-6.
5. Monk IR, Gahan CG, Hill C. 2008. Tools for functional postgenomic analysis of *Listeria monocytogenes*. *Appl Environ Microbiol* 74:3921-34.
6. Bishop DK, Hinrichs DJ. 1987. Adoptive transfer of immunity to *Listeria monocytogenes*. The influence of in vitro stimulation on lymphocyte subset requirements. *J Immunol* 139:2005-9.
